# Supplementary material
Source: PubMed Central journal article supplement (PMC3651484)
Supplement: 1220823110_pnas.201220823SI.pdf [file 1220823110_pnas.201220823SI.pdf]

# Supporting Information

Okamoto et al. 10.1073/pnas.1220823110

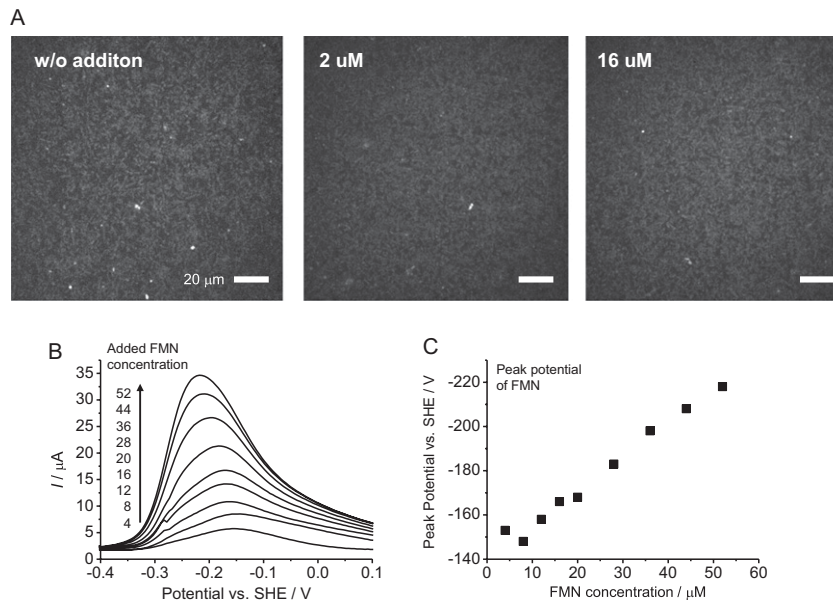

**Fig. S1.** (A) Confocal fluorescent images of GFP-labeled MR-1 cells attached on an indium tin-oxide (ITO) electrode surface in the presence of 0, 2, or 16  $\mu\text{M}$  flavin mononucleotide (FMN) (*left*, *center*, and *right* panels in A). The number of cells attached on the surface did not change, even 1 h after the addition of 16.0  $\mu\text{M}$  FMN. (B) Differential pulse (DP) voltammograms for monolayer biofilms of *Shewanella oneidensis* MR-1 on an ITO electrode surface in the presence of 4, 8, 12, 16, 20, 28, 36, 44, and 52  $\mu\text{M}$  FMN. (C) Plot of the peak potential ( $E_p$ ) of FMN against added FMN concentration. As the FMN concentration increased, the  $E_p$  of FMN shifted to that of free-form FMN. SHE, standard hydrogen electrode.

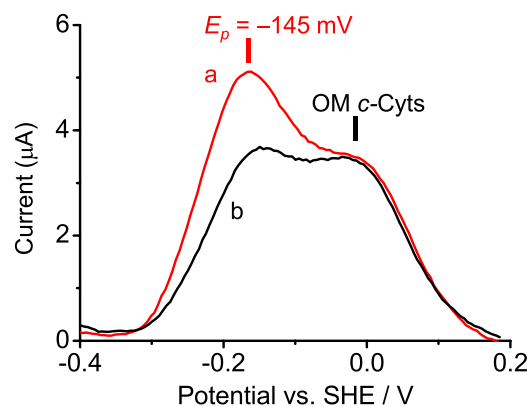

**Fig. S2.** DP voltammograms for monolayer biofilms of *Shewanella oneidensis* MR-1 on an ITO electrode surface in the presence of 2.0  $\mu\text{M}$  FMN (a) before and (b) after the addition of 1.0 mM tocopherol. Current was normalized by the redox peak current of outer-membrane c-type cytochromes (OM c-Cyts) at  $E_p = +50 \text{ mV}$ .

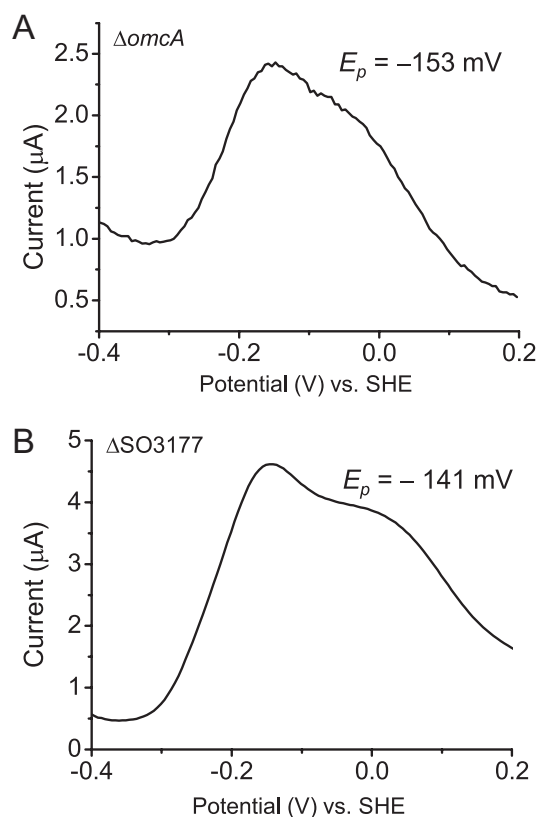

Fig. S3. DP voltammograms of a monolayer biofilm of strains  $\Delta omcA$  (A) and  $\Delta SO3177$  (B) in the presence of  $2.0 \mu M$  flavin mononucleotide.

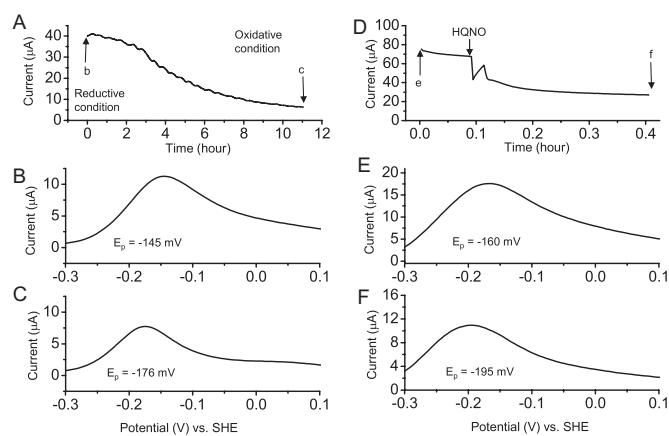

Fig. S4. (A) Current vs. time measurements of microbial current generation for strain MR-1 cells on an ITO electrode surface at  $+200$  mV (vs. Ag/AgCl KCl saturated) in a reactor containing  $10$  mM lactate and  $16.0 \mu M$  flavin mononucleotide (FMN). DP voltammetry was performed (B) before and (C) after lactate oxidation current decrease. (D) Current vs. time measurements of microbial current generation for strain MR-1 cells on an ITO electrode surface at  $+200$  mV in a reactor containing  $10$  mM lactate and  $4.0 \mu M$  FMN. DP voltammetry was performed (E) before and (F) after the lactate oxidation current decrease by the addition of  $1$  mM 2-heptyl 4 hydroxyquinoline *N*-oxide (HQNO). HQNO (>99% purity; Santa Cruz Biotech) was added as aliquots from a stock solution of  $50$  mM in ethanol/water (50/50, vol/vol). SHE, standard hydrogen electrode.
